# Supplementary material
Source: Elsevier journal article supplement (https://www.sciencedirect.com/science/article/pii/S0121812320301535)
Supplement: mmc1 [file S0121812320301535:mmc1.doc]

**Supplementary material**

| **Table S1. Searching keywords for each database** | |
| --- | --- |
| **Database** | **Keywords** |
| PubMed | ((("Scleroderma, Systemic"[Mesh]) OR (CREST syndrome[tw]) OR (scleroderma[tw]) OR (SSc[tw]) OR (systemic sclerosis[tw])) AND (("Joint diseases"[Mesh]) OR ("Musculoskeletal Diseases"[Mesh])) |
| Cochrane Central | ((("Scleroderma, Systemic"[Mesh]) OR (CREST syndrome[tw]) OR (scleroderma[tw]) OR (SSc[tw]) OR (systemic sclerosis[tw])) AND (("Joint diseases"[Mesh]) OR ("Musculoskeletal Diseases"[Mesh])) |
| Embase | ((("Scleroderma, Systemic"/exp) OR (CREST syndrome) OR (scleroderma) OR (SSc) OR (systemic sclerosis)) AND (("Joint diseases"/exp) OR ("Musculoskeletal Diseases"/exp))) |
| Lilacs | (("Systemic sclerosis" OR "CREST" OR "scleroderma") AND ("arthritis" OR "Joint disease") NOT ("**rheumatoid** arthritis") ) |
| Scielo | (("Systemic sclerosis" OR "CREST" OR "scleroderma") AND ("arthritis" OR "Joint disease") NOT ("**rheumatoid** arthritis") ) |

| **Table S2. Articles excluded of the systematic review.** | | | | |
| --- | --- | --- | --- | --- |
| **Author** | **Year** | **Study design** | **Reference** | **Reason for exclusion** |
| Apipattarakul R, et al. | 2018 | Cohort | Clin Exp Rheumatol. 2018;36 Suppl 113:76-81. | Related to muscle involvement |
| Justo AC, et al. | 2017 | Case-control | Clin Biomech (Bristol, Avon). 2017;47:33-39 | Related to muscle involvement |
| Paik JJ, et al. | 2017 | Cross-sectional | Arthritis Care Res (Hoboken). 2017;69:1764-1770. | Related to muscle involvement |
| Hudson M, et al | 2016 | Cross-sectional | Medicine (Baltimore). 2016;95:e5280. | Related to muscle involvement |
| Paik JJ, et al. | 2016 | Cross-sectional | Arthritis Care Res (Hoboken). 2016;68:1695-1703. | Related to muscle involvement |
| Hoa S, et al. | 2016 | Cohort | Medicine (Baltimore). 2016;95:e4713. | The results do not contain very relevant information for osteoarticular manifestations |
| Bhansing KJ, et al. | 2016 | Cross-sectional | J Rheumatol. 2016;43(10):1838-1843. | Related to muscle involvement |
| Wodkowski M, et al. | 2015 | Cohort | Autoimmunity. 2015;48:542-51. | The results do not contain very relevant information for osteoarticular manifestations |
| Patterson KA, et al. | 2015 | Cross-sectional | Arthritis Rheumatol. 2015;67:3234-44. | The results do not contain very relevant information for osteoarticular manifestations |
| Lima TR, et al | 2015 | Cross-sectional | J Bodyw Mov Ther. 2015;19:17-24. | The results do not contain very relevant information for osteoarticular manifestations |
| Motegi S, et al. | 2015 | Cross-sectional | J Dermatol. 2015;42:189-92. | The results do not contain very relevant information for osteoarticular manifestations |
| Piga M, et al | 2014 | Clinical trial | J Rheumatol. 2014;41:1324-33. | Results are more relevant for rheumatoid arthritis than for systemic sclerosis |
| Jung M, et al. | 2014 | Cohort | Scand J Rheumatol. 2014;43:217-20. | Related to muscle involvement |
| Kaji K, et al. | 2014 | Case-control | Arthritis Care Res (Hoboken). 2014;66:575-84 | Related to muscle involvement |
| Tolédano C, et al. | 2012 | Cohort | Arthritis Res Ther. 2012;14:R152. | Related to muscle involvement |
| Alcacer-Pitarch B, et al. | 2012 | Clinical trial | doi.org/10.1136/annrheumdis-2013-eular.1517 | The results do not contain very relevant information for the purpose of the review. |
| Ranque B, et al. | 2010 | Case-control | Scand J Rheumatol. 2010;39:498-505. | Related to muscle involvement |
| Bassyouni IH, et al. | 2011 | Case-control | Joint Bone Spine. 2011;78:56-61. | Related to muscle involvement |
| Martin MM. | 2009 | Cohort | J Bodyw Mov Ther. 2009;13:320-7. | The results do not contain very relevant information for the purpose of the review. |
| Ranque B, et al. | 2009 | Cross-sectional | Ann Rheum Dis. 2009;68:1474-7. | Related to muscle involvement |
| Wu R, et al. | 2007 | Cross-sectional | Clin Rev Allergy Immunol. 2007;32:47-56. | The results do not contain very relevant information for the purpose of the review. |
| Sharma VK, et al. | 2006 | Cross-sectional | Indian J Dermatol Venereol Leprol. 2006;72:416-20 | The results do not contain very relevant information for osteoarticular manifestations |
| Smucker JD, et al. | 2006 | Case series | Spine (Phila Pa 1976). 2006;31:2002-8. | The results do not contain very relevant information for the purpose of the review. |
| Mimura Y, et al. | 2005 | Cross-sectional | Clin Rheumatol. 2005;24:99-102. | Related to muscle involvement |
| Franceschini F, et al. | 2002 | Cross-sectional | J Rheumatol. 2002;29:1393-7. | The results do not contain very relevant information for the purpose of the review. |
| Kubo M, et al. | 2002 | Cross-sectional | Rheumatology (Oxford). 2002;41:531-4. | Related to muscle involvement |
| Frank MB, et al. | 1999 | Cross-sectional | J Autoimmun. 1999;12:137-42. | Related to muscle involvement |
| Banci M, et al. | 1998 | Cross-sectional | Angiology. 1998;49:641-8 | Related to muscle involvement |
| Schnitz W, et al. | 1996 | Cross-sectional | J Rheumatol. 1996;23:1729-33. | Related to muscle involvement |
| Horiki T, et al. | 1996 | Case series | Arthritis Rheum. 1996;39:152-6. | The results do not contain very relevant information for the purpose of the review. |
| Follansbee WP, et al. | 1993 | Cross-sectional | Am Heart J. 1993;125:194-203. | Related to muscle involvement |
| Okano Y, et al. | 1992 | Cross-sectional | Arthritis Rheum. 1992;35:95-100. | The results do not contain very relevant information for osteoarticular manifestations |
| Yuan X, et al. | 1991 | Cross-sectional | Chin Med Sci J. 1991;6:107-9. | Related to muscle involvement |
| Ringel RA, et al. | 1990 | Cross-sectional | Arch Intern Med. 1990;150:2550-2. | Related to muscle involvement |
| Clements PJ, et al. | 1978 | Cross-sectional | Arthritis Rheum. 1978;21:62-71. | Related to muscle involvement |

Table S3, Risk assessment - cohort studies

|  | Appropriate and clearly focused question | Selection bias | Performance bias | Attrition bias | Detection bias | Confusion bias | Stadistical analysis |
| --- | --- | --- | --- | --- | --- | --- | --- |
| Avouac, 2016 (18) | + | + | + | + | + | + | + |
| Bálint, 2014 (20) | + | ? | + | + | + | ? | - |
| Avouac, 2011 (23) | + | + | + | + | + | + | + |
| Khanna, 2010 (24) | + | + | + | - | + | + | - |
| Steen, 1997 (25) | + | ? | + | ? | + | ? | - |
| Valenzuela, 2016 (32) | + | + | + | ? | + | + | + |
| Omair, 2014 (40) | + | ? | + | - | + | + | - |
| Caimmi, 2016 (41) | + | - | + | - | + | + | - |
| Santiago, 2008 (58) | + | - | ? | ? | - | ? | - |
| Kamalaksha, 2018 (62) | + | - | + | - | + | ? | - |
| Serup, 1986 (64) | + | - | + | - | + | - | - |
| Foocharoen, 2016 (65) | + | + | + | + | + | ? | + |
| Radić, 2006 (66) | + | - | + | - | - | ? | - |
| Blocka, 1981 (71) | + | - | + | - | + | ? | - |
| Kwakkenbos, 2018 (90) | + | ? | - | - | - | ? | + |
| Peytrignet, 2018 (94) | + | ? | + | - | + | + | + |
| Sandqvist, 2009 (95) | + | ? | ? | - | + | ? | + |
| Omair, 2012 (108) | + | ? | + | ? | ? | ? | - |
| Elhai, 2013 (110) | + | - | + | - | + | ? | - |
| DeLea, 2011 (112) | +. | - | + | + | + | ? | + |
| Seeger, 1987 (113) | + | - | + | - | ? | - | - |

|  | High risk of bias |
| --- | --- |
|  | Unclear risk of bias |
|  | Low risk of bias |

Tool used: Sign.

*Scottish Intercollegiate Guidelines Network. CRITICAL APPRAISAL: NOTES AND CHECKLISTS. [Internet]* [*http://www.sign.ac.uk/methodology/checklists.html*](http://www.sign.ac.uk/methodology/checklists.html)

**Table S4, Risk assessment – case -control studies**

|  | Appropriate and clearly focused question | Selection bias | Detection bias | Confusion bias | Stadistical analysis |
| --- | --- | --- | --- | --- | --- |
| Avouac, 2010 (2) | + | + | + | + | + |
| Schmeiser, 2012 (5) | + | - | - | + | + |
| Wangkaew, 2018 (7) | + | + | ? | + | + |
| Jaeger, 2018 (10) | + | ? | + | + | - |
| Allali, 2007 (12) | ? | + | ? | + | + |
| Arslan, 2015 (19) | + | + | + | + | + |
| Ashida, 2007 (21) | + | ? | - | ? | - |
| Doré, 2013 (26) | + | + | + | + | + |
| Tas, 2012 (27) | + | ? | ? | - | - |
| Jonhstone, 2012 (29) | + | - | + | + | + |
| Koutaissoff, 2011 (30) | + | - | - | ? | - |
| Morardet, 2016 (31) | + | ? | - | + | + |
| Avouac, 2006 (33) | + | ? | + | ? | - |
| La Montagna, 1991 (38) | + | ? | ? | - | - |
| Rios-Fernández, 2012 (39) | + | ? | ? | - | - |
| Frediani, 2004 (42) | + | ? | - | - | - |
| Kilic, 2016 (43) | + | + | + | + | - |
| Avouac, 2012 (44) | + | + | + | + | + |
| Mok, 2013 (45) | + | ? | + | ? | - |
| Souza, 2006 (46) | + | + | + | + | + |
| Atteritano, 2013 (47) | + | + | + | + | - |
| Yacoub, 2012 (49) | + | + | + | + | - |
| Sampaio-Barros, 2005 (50) | + | - | + | ? | - |
| Koumakis, 2015 (51) | + | + | + | + | + |
| Di Munno, 1995 (52) | + | ? | + | ? | - |
| Fauny, 2018 (53) | + | + | + | + | + |
| Ruaro, 2018 (54) | + | ? | + | ? | - |
| Marot, 2015 (55) | + | + | ? | + | - |
| Polimeni, 2012 (56) | ? | ? | ? | - | - |
| Stamenković, 2012 (59) | + | ? | + | - | - |
| Ingegnoli, 2006 (60) | + | - | + | - | ? |
| Ueda-Hayakawa, 2010 (61) | + | - | ? | - | ? |
| Gheita, 2012 (67) | + | + | - | ? | - |
| Yanaba, 2012 (68) | + | + | + | ? | + |
| La Montagna, 2003 (69) | + | - | - | ? | + |
| Lescoat, 2018 (80) | + | - | + | ? | + |
| Bruni, 2017 (106) | + | + | ? | - | - |

|  | High risk of bias |
| --- | --- |
|  | Unclear risk of bias |
|  | Low risk of bias |

Tool used: Sign.

*Scottish Intercollegiate Guidelines Network. CRITICAL APPRAISAL: NOTES AND CHECKLISTS. [Internet]* [*http://www.sign.ac.uk/methodology/checklists.html*](http://www.sign.ac.uk/methodology/checklists.html)

**Table S5, Risk assessment – diagnostic test study**

|  | Patient selection | Index test | Reference standard | Flow and timing |
| --- | --- | --- | --- | --- |
| Morita, 2008 (57) | ? | ? | ? | + |
| Freire, 2013 (73) | + | + | + | + |
| Chitale, 2010 (74) | + | + | + | + |
| Abdel-Magied, 2013 (75) | + | + | + | + |
| Cuomo, 2009 (76) | + | + | ? | + |
| Elhai, 2012 (77) | ? | + | - | + |
| Kilic, 2015 (78) | + | + | - | - |
| Iagnocco, 2013 (79) | + | + | - | - |
| Low, 2009 (82) | - | + | - | ? |
| Tehranzadeh, 2006 (83) | - | ? | ? | - |
| Stoenoiu, 2013 (84) | + | + | + | + |

|  | High risk of bias |
| --- | --- |
|  | Unclear risk of bias |
|  | Low risk of bias |

Tool used: Quadas.

*University of Bristol UK. QUADAS-2: Background Document. [Internet] http://www.bris.ac.uk/quadas/*

**Table S6, Risk assessment – clinical trial**

|  | Random sequence generation | Allocation concealment | Performance bias | Detection bias | Attrition bias | Reporting bias | Other bias |
| --- | --- | --- | --- | --- | --- | --- | --- |
| Nacci, 2007 (107) | - | - | - | - | - | - | - |
| Allanore (111) | ? | ? | ? | ? | ? | ? | ? |

|  | High risk of bias |
| --- | --- |
|  | Unclear risk of bias |
|  | Low risk of bias |

Tool used: Cochrane risk assessment tool

*Centro Cochrane Iberoamericano, traductores. Manual Cochrane de Revisiones Sistemáticas de Intervenciones, versión 5.1.0 [actualizada en marzo de 2011] [Internet]. Barcelona: Centro Cochrane Iberoamericano; 2012. Disponible en* [*http://www.cochrane.es/?q=es/node/269*](http://www.cochrane.es/?q=es/node/269)

*Iberoamerican Cochrane Center, translators. Cochrane Manual of Systematic Reviews of Interventions, version 5.1.0 [updated in March 2011] [Internet]. Barcelona: Ibero-American Cochrane Center; 2012. Available at* [*http://www.cochrane.es/?q=es/node/269*](http://www.cochrane.es/?q=es/node/269)
